# Supplementary material for: Amplified Drought Alters Leaf Litter Metabolome, Slows Down Litter Decomposition, and Modifies Home Field (Dis)Advantage in Three Mediterranean Forests
Source: MDPI journal article supplement (doi:10.3390/plants11192582), 2022-09-30
Supplement: s1 [file s1]

## Supporting informations

**Figure S1.** Rain exclusion devices in the three forests studied: a) *Quercus pubescens* forest at O<sub>3</sub>HP, b) *Quercus ilex* at Puechabon and c) *Pinus halepensis* at Fontblanche (according [19]).

a)

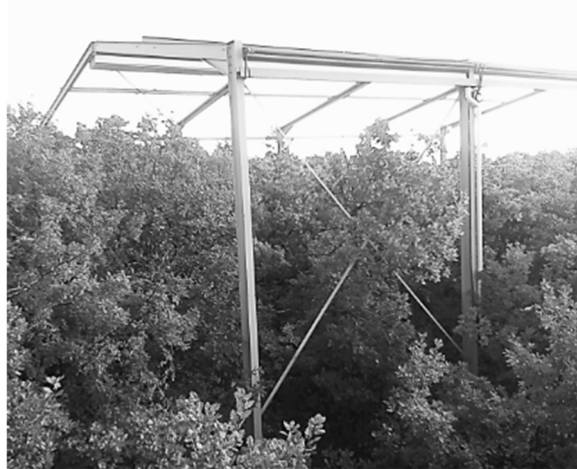

b)

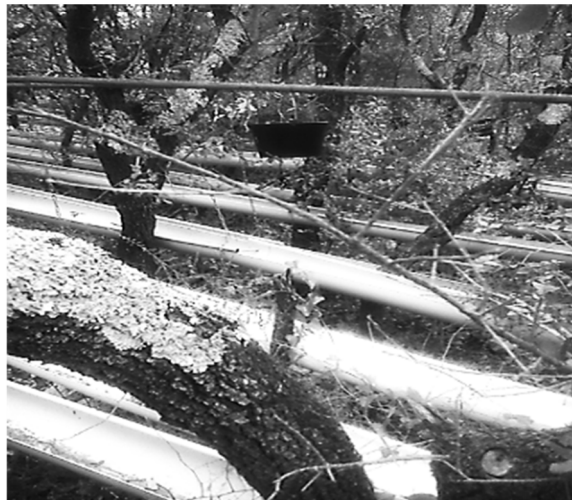

c)

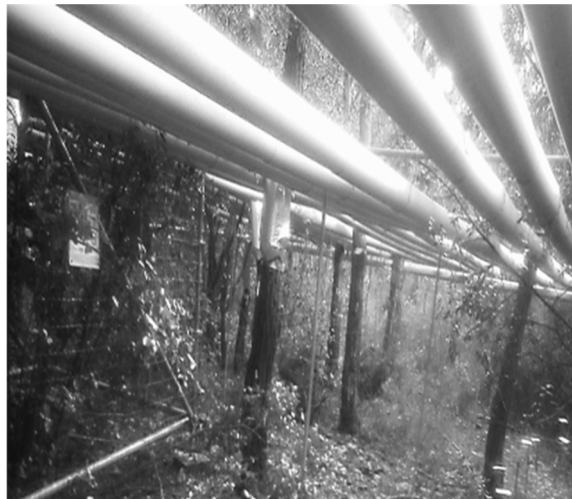

**Figure S2.** Ombrothermic diagrams at a) *Quercus pubescens* forest, b) *Quercus ilex* forest and c) *Pinus halepensis* forest study sites between December 2014 to December 2016. Dotted line and black triangle represent mean monthly temperature (°C) and lines represent mean monthly precipitation (mm) with black circle for ND plots and open circle for AD plots. ND: natural drought and AD: Amplified Drought (according [19])

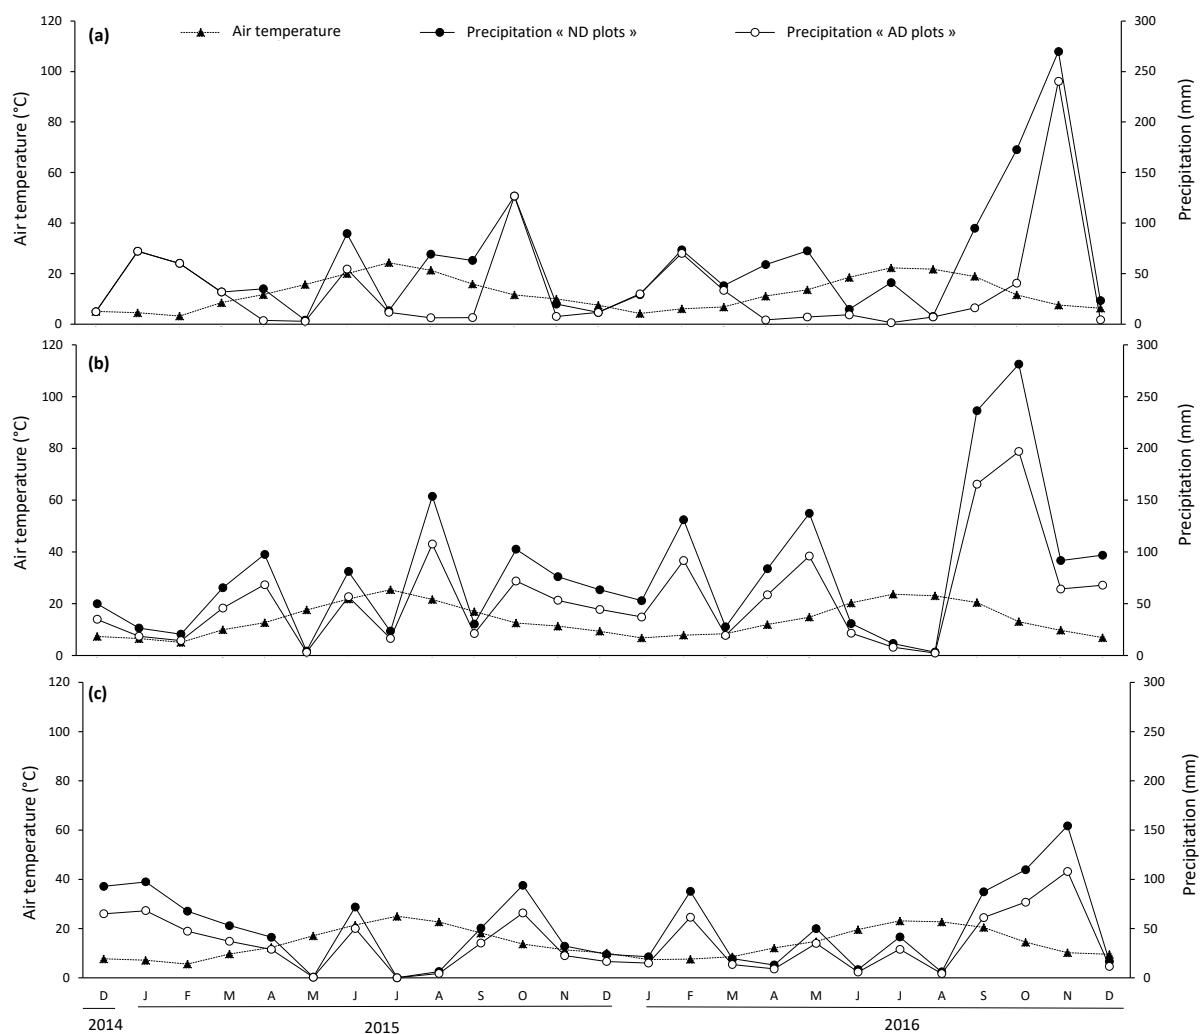

**Figure S3.** Location of the three forests studied: *Quercus ilex* forest (Puéchabon), *Quercus pubescens* forest (O3HP), and *Pinus halepensis* forest (Font blanche).

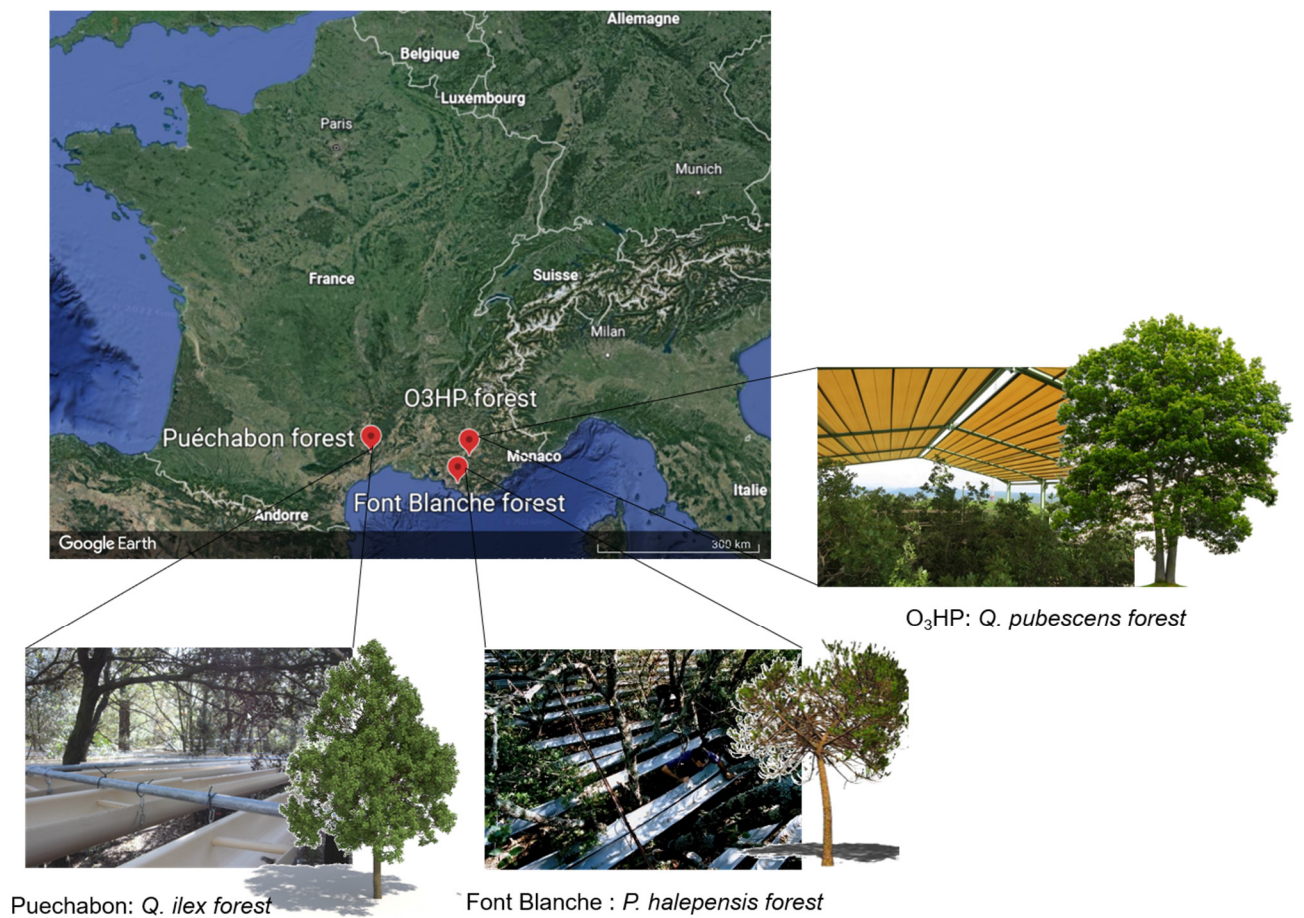

**Table S1.** Metabolites putatively identified from litter extracts of *Q. ilex* according to litter types (senescent leaves collected in Natural Drought (ND) and Amplified Drought (AD) plots). RT: Retention Time in minutes, VIP: Variable Important in Projection. mSigma is a constructor quality value of the formula determination. The closer the value is to zero, the more accurate the result.

| Litter types | VIP                | RT (min) | Measured m/z [M+H] <sup>+</sup> | Measured m/z [M-H] <sup>-</sup> | Measured molecular formula [M-H] <sup>-</sup>   | Error (PPM) | mSigma | MS/MS, m/z (ESI-)                                        | Putative identification                           | Ref. |
|--------------|--------------------|----------|---------------------------------|---------------------------------|-------------------------------------------------|-------------|--------|----------------------------------------------------------|---------------------------------------------------|------|
| <b>AD</b>    | M345T430           | 7.17     | 369.1903 [M+Na] <sup>+</sup>    | 345.1553                        | C <sub>16</sub> H <sub>25</sub> O <sub>8</sub>  | 1.1         | 9.9    | 326.9775<br>270.9846<br>215.2774<br>161.0462<br>101.0239 | Unknown glycoside 1                               |      |
| <b>ND</b>    | M373T51            | 0.85     | /                               | 373.1349                        | C <sub>13</sub> H <sub>25</sub> O <sub>12</sub> | 0.4         | 21     | NA                                                       | Unknown 1                                         |      |
| <b>AD</b>    | M615T468           | 7.8      | 617.114                         | 615.0987                        | C <sub>28</sub> H <sub>25</sub> O <sub>16</sub> | 0.9         | 9.1    | 463.0872<br>301.0348<br>300.0270                         | Quercetin-3-O-(6''-O-galloyl)-b-D-glucopyranoside | [44] |
| <b>AD</b>    | M629T496           | 8.26     | 631.129                         | 629.1144                        | C <sub>29</sub> H <sub>25</sub> O <sub>16</sub> | 1.1         | 28     | 477.1025<br>315.0505<br>313.0567<br>169.0141             | Isorhamnetin 3-(6''-galloylglucoside)             | [44] |
| <b>AD</b>    | M452T367           | 6.12     | /                               | 451.2183 [M+HCOO] <sup>-</sup>  | C <sub>20</sub> H <sub>35</sub> O <sub>11</sub> |             |        | 405.2131<br>167.1074                                     | Unknown 2                                         |      |
|              |                    |          |                                 | 405.2131                        | C <sub>19</sub> H <sub>33</sub> O <sub>9</sub>  | -0.3        | 6.7    | 167.1074                                                 |                                                   |      |
| <b>AD</b>    | M340T388 (isotope) | 6.47     | 341.086                         | 339.0717                        | C <sub>15</sub> H <sub>15</sub> O <sub>9</sub>  | 1.5         | 2.3    | 177.0192                                                 | Aesculin                                          | [45] |
| <b>ND</b>    | M387T49            | 0.81     | /                               | 387.1143 [M+HCOO] <sup>-</sup>  | C <sub>13</sub> H <sub>23</sub> O <sub>13</sub> | 0.5         | 11     | 341.1089<br>207.0511<br>179.0550                         | Disaccharide                                      |      |
|              |                    |          |                                 | 341.1086                        | C <sub>12</sub> H <sub>21</sub> O <sub>11</sub> | 0.9         | 13.8   | 161.0459<br>119.0444<br>101.0235                         |                                                   |      |

|           |                      |      |                                |                                   |                                                 |      |      |                                                                                 |                         |              |
|-----------|----------------------|------|--------------------------------|-----------------------------------|-------------------------------------------------|------|------|---------------------------------------------------------------------------------|-------------------------|--------------|
| <b>AD</b> | M391T466             | 7.77 | /                              | 391.1037<br>[M+HCOO] <sup>-</sup> | C <sub>17</sub> H <sub>27</sub> O <sub>10</sub> | 2.2  | 27.5 | 183.1025                                                                        | Unknown glycoside 2     |              |
|           |                      |      |                                | 345.1557                          | C <sub>16</sub> H <sub>25</sub> O <sub>8</sub>  | -0.7 | 17.0 |                                                                                 |                         |              |
| <b>AD</b> | M330T66<br>(isotope) | 1.09 | /                              | 331.0671                          | C <sub>13</sub> H <sub>15</sub> O <sub>10</sub> | -0.5 | 21.6 | 169.0138                                                                        | galloyl-β-D-glucose     | [44]         |
| <b>AD</b> | M619T544             | 9.07 | 633.275<br>[M+Na] <sup>+</sup> | 619.2602                          | C <sub>28</sub> H <sub>43</sub> O <sub>15</sub> | 3.6  | 31.6 | 399.1301<br>339.1084<br>225.0770<br>195.0663                                    | Unknown 3               |              |
| <b>AD</b> | M463T416             | 6.92 | /                              | 463.1822                          | C <sub>20</sub> H <sub>31</sub> O <sub>12</sub> | 4.2  | 25.2 | 180.9354<br>166.0657                                                            | Unknown (low intensity) |              |
| <b>AD</b> | M399T407             | 6.78 | 355.101                        | 399.0934                          | C <sub>16</sub> H <sub>17</sub> O <sub>9</sub>  | -3.9 | NA   | 176.0104                                                                        | Chlorogenic acid        | [46]         |
|           |                      |      |                                | 353.0875                          | C <sub>17</sub> H <sub>19</sub> O <sub>1</sub>  | -3.3 | 23.0 | 191.0356                                                                        |                         | [47]<br>[48] |
| <b>AD</b> | M345T464             | 7.74 | /                              | 345.1554                          | C <sub>16</sub> H <sub>25</sub> O <sub>8</sub>  | 0.9  | 14   | 183.1022<br>161.0450<br>165.0917<br>119.0350<br>113.0229<br>101.0240<br>85.0293 | Unknown glycoside 3     |              |
| <b>AD</b> | M429T51              | 0.85 | /                              | 429.1252                          | C <sub>15</sub> H <sub>25</sub> O <sub>14</sub> | 1    | 22.3 | NA                                                                              | Unknown 4               |              |
| <b>AD</b> | M391T459             | 7.64 | /                              | 391.1607<br>[M+HCOO] <sup>-</sup> | C <sub>17</sub> H <sub>27</sub> O <sub>10</sub> | 2.2  | 27.5 | 183.1025                                                                        | Unknown glycoside 4     |              |
|           |                      |      |                                | 345.1554                          | C <sub>16</sub> H <sub>25</sub> O <sub>8</sub>  | 0.8  | 12.3 | 183.1024<br>(C <sub>10</sub> H <sub>15</sub> O <sub>3</sub> )                   |                         |              |

**Table S2.** Metabolites putatively identified from litter extracts of *Q. pubescens* according to litter types (se-nescent leaves collected in Natural Drought (ND) and Amplified Drought (AD) plots). RT: Re-tention Time in minutes, VIP: Variable Important in Projection. mSigma is a constructor quality value of the formula determination. The closer the value is to zero, the more accurate the result.

| Litter types | VIP      | RT (min) | Measured m/z [M+H] <sup>+</sup> | Measured m/z [M-H] <sup>-</sup>   | Measured molecular formula [M-H] <sup>-</sup>   | Error (PPM) | mSigma | MS/MS, m/z (ESI-)                            | Putative identification        | Ref. |
|--------------|----------|----------|---------------------------------|-----------------------------------|-------------------------------------------------|-------------|--------|----------------------------------------------|--------------------------------|------|
| <i>AD</i>    | M711T533 | 8.88     | /                               | 711.3964<br>[M+HCOO] <sup>-</sup> | C <sub>37</sub> H <sub>59</sub> O <sub>13</sub> | -0.5        | 25.8   | 503.3385                                     | Arjungenin glycoside isomer 1  | [49] |
|              |          |          |                                 | 665.3906                          | C <sub>36</sub> H <sub>57</sub> O <sub>11</sub> | 4.6         | na     |                                              |                                |      |
| <i>AD</i>    | M243T473 | 7.87     | /                               | 243.1601                          | C <sub>13</sub> H <sub>23</sub> O <sub>4</sub>  | 0           | 11.7   | 183.1391<br>117.0379                         | Unknown 1                      |      |
| <i>AD</i>    | M461T368 | 6.13     | 485.1279<br>[M+Na] <sup>+</sup> | 461.1302                          | C <sub>19</sub> H <sub>25</sub> O <sub>13</sub> | -0.7        | 11.5   | 152.0113<br>108.0215                         | Unknown 2                      |      |
| <i>AD</i>    | M711T496 | 8.26     | /                               | 711.3965<br>[M+HCOO] <sup>-</sup> | C <sub>37</sub> H <sub>59</sub> O <sub>13</sub> | -0.9        | 14.9   | /                                            | Arjungenin glycoside isomer 2  | [49] |
|              |          |          |                                 | 665.3906                          | C <sub>36</sub> H <sub>57</sub> O <sub>11</sub> | -5.5        | 425.9  |                                              |                                |      |
| <i>AD</i>    | M427T396 | 6.59     | /                               | 427.1820<br>[M+HCOO] <sup>-</sup> | C <sub>17</sub> H <sub>31</sub> O <sub>12</sub> | -0.3        | 8.2    | 381.1782<br>299.0799                         | Unknown Glycoside              |      |
|              |          |          |                                 | 381.1774                          | C <sub>16</sub> H <sub>29</sub> O <sub>10</sub> | 1.9         | 77.7   | 235.1193<br>187.0974<br>181.0524<br>144.0465 |                                |      |
| <i>AD</i>    | M503T633 | 10.55    | /                               | 503.3382                          | C <sub>30</sub> H <sub>47</sub> O <sub>6</sub>  | -0.5        | 3.9    | 455.3178<br>304.9155<br>174.9552             | Oleane triterpene              | [50] |
| <i>AD</i>    | M491T429 | 7.15     | 515.1897<br>[M+Na] <sup>+</sup> | 491.1408                          | C <sub>20</sub> H <sub>27</sub> O <sub>14</sub> | -1.6        | 1.6    | 293.0887<br>151.0403                         | Unknown 3                      |      |
| <i>AD</i>    | M695T600 | 10.00    | /                               | 695.4018<br>[M+HCOO] <sup>-</sup> | C <sub>37</sub> H <sub>59</sub> O <sub>12</sub> | -1.4        | 6.9    | 487.3449                                     | Arjunglucoside II or arjunetin | [49] |
|              |          |          |                                 | 649.3957                          | C <sub>36</sub> H <sub>57</sub> O <sub>10</sub> | -2.7        | NA     |                                              |                                | [51] |
| <i>AD</i>    | M431T383 | 6.38     | /                               | 431.1196                          | C <sub>18</sub> H <sub>23</sub> O <sub>12</sub> | -0.1        | 11.3   | 137.0250<br>93.0346                          | Unknown 4                      |      |
| <i>ND</i>    | M387T49  | 0.81     | /                               | 387.1144                          | C <sub>13</sub> H <sub>23</sub> O <sub>13</sub> | 0.5         | 11     | 341.1086<br>179.0559<br>119.0349             | Disaccharide                   | [48] |
| <i>AD</i>    | M415T631 | 10.51    | /                               | 415.1320                          | C <sub>22</sub> H <sub>23</sub> O <sub>8</sub>  | 0.8         | 27.6   | 400.1188<br>385.9936<br>341.1028<br>301.0361 | Unknown 5                      |      |
| <i>ND</i>    | M702T383 | 6.38     | /                               | 701.5749                          | C <sub>57</sub> H <sub>46</sub> O <sub>42</sub> | 0.9         | 220.4  | 679.0745                                     | Ellagitannin                   | [52] |

|           |           |       |         |                                 |                                                 |      |      |                                                                                             |                                          |      |
|-----------|-----------|-------|---------|---------------------------------|-------------------------------------------------|------|------|---------------------------------------------------------------------------------------------|------------------------------------------|------|
|           | (isotope) |       |         | [M-H] <sup>2-</sup>             |                                                 |      |      | 617.0666<br>300.9991<br>249.0400<br>275.0191<br>231.0293<br>123.0083                        |                                          |      |
| <i>AD</i> | M593T520  | 8.66  | /       | 593.1591<br>[M-H] <sup>2-</sup> | C <sub>60</sub> H <sub>50</sub> O <sub>26</sub> | -1.6 | 24.7 | 285.0408                                                                                    | Proanthocyanidin (Cat-Cat-GalCat-GalCat) | [53] |
| <i>AD</i> | M343T637  | 10.61 | /       | 343.0460                        | C <sub>17</sub> H <sub>11</sub> O <sub>8</sub>  | 0.3  | 4.8  | 328.0216<br>312.9923<br>297.9722<br>286.9462<br>269.9814                                    | Galloylquinic acid isomer                |      |
| <i>AD</i> | M289T405  | 6.74  | 291.086 | 289.0716                        | C <sub>15</sub> H <sub>14</sub> O <sub>6</sub>  | 1.6  | 11.4 | 245.0823<br>221.0835<br>203.0720<br>151.0401<br>137.0246<br>123.0453<br>109.0293<br>97.0298 | (epi)catechin                            | [54] |
